# Supplementary material for: HMGA2 overexpression predicts relapse susceptibility of blastemal Wilms tumor patients
Source: PubMed Central journal article supplement (PMC5777772; doi:10.18632/oncotarget.23256), 2017-12-14
Supplement: oncotarget-08-115290-s001.pdf [file oncotarget-08-115290-s001.pdf]

# HMGA2 overexpression predicts relapse susceptibility of blastemal Wilms tumor patients

## SUPPLEMENTARY MATERIALS

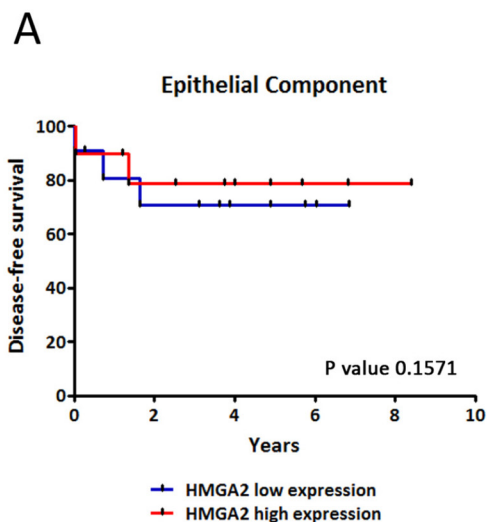

**B**

| <b>HMGA2</b>                                 |             |
|----------------------------------------------|-------------|
| <b>High expression in epithelial samples</b> |             |
| Ki67 <10%                                    | 7 (58.33%)  |
| Ki67 >10%                                    | 5 (41.67%)  |
| <b>Low expression in epithelial samples</b>  |             |
| Ki67 <10%                                    | 10 (90.91%) |
| Ki67 >10%                                    | 1 (9.09%)   |

**Fisher’s exact test: P value 0.1550**

**Supplementary Figure 1: Study of HMGA2 expression in epithelial WT component.** (A) Kaplan–Meier disease-free survival according to *HMGA2* transcript tumor expression did not show statistically significant differences. (B) Relationship between high and low expression of HMGA2 and Ki-67 in epithelial WT component.

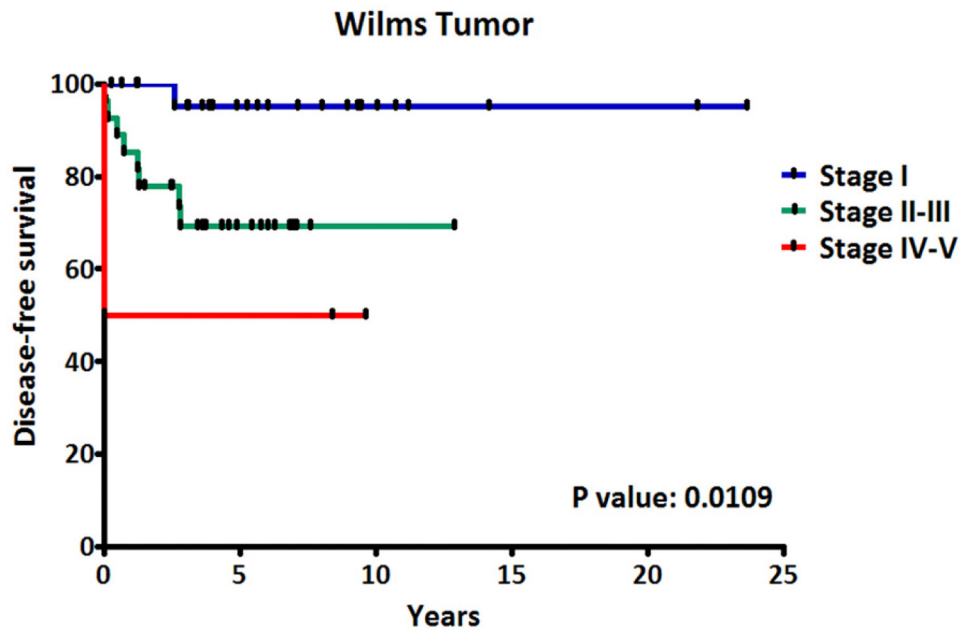

**Supplementary Figure 2: Disease-free survival rate according to tumor stage.** (A) Tumor stage IV-V showed reduced disease-free survival compared with stage I-II-III.

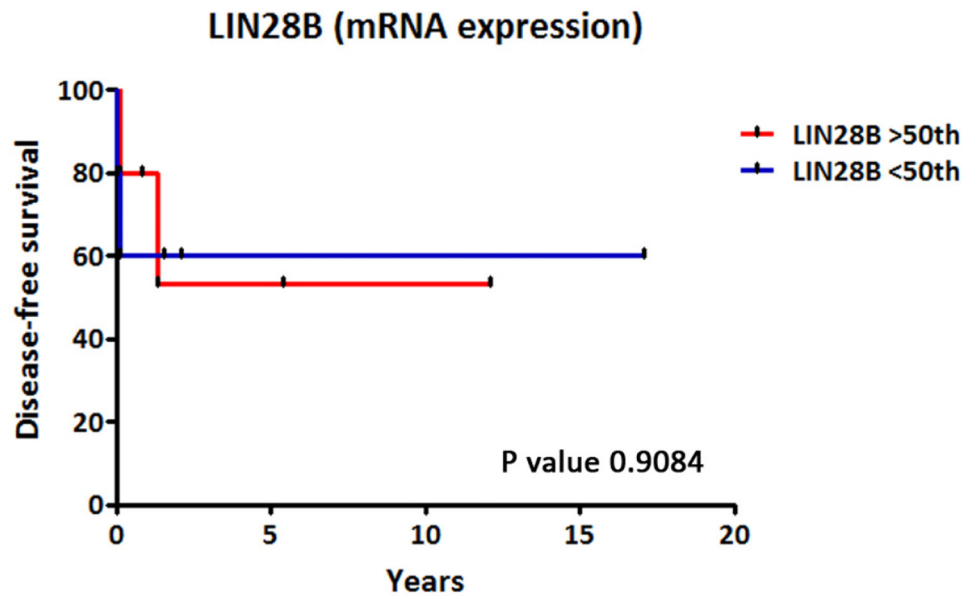

**Supplementary Figure 3: Study of *LIN28B* expression in blastemal WT component.** *LIN28B* Kaplan–Meier plot with disease-free survival according to the transcript blastemal tumor expression did not show statistically significant differences between low and high expression.

Supplementary Table 1: Clinicopathological features of the tumor samples

|                             | Series 1           | Series 2             |
|-----------------------------|--------------------|----------------------|
| <b>Samples</b>              | Frozen Wilms Tumor | Paraffin Wilms Tumor |
| <b>Number of samples</b>    | 11                 | 70                   |
| <b>Age in years (range)</b> | 2 months- 6 years  | 5 months- 41 years   |
| <b>Gender</b>               |                    |                      |
| Male                        | 7                  | 34                   |
| Female                      | 4                  | 36                   |
| <b>Relapse</b>              |                    |                      |
| Present                     | 4                  | 15                   |
| Absent                      | 7                  | 55                   |
| <b>Tumor Component</b>      |                    |                      |
| Blastemal                   | 11                 | 25                   |
| Epithelial                  | -                  | 36                   |
| Stromal                     | -                  | 9                    |
| <b>Stage</b>                |                    |                      |
| I                           | 5                  | 29                   |
| II                          | 1                  | 13                   |
| III                         | 3                  | 23                   |
| IV                          | 2                  | 4                    |
| V                           | 0                  | 1                    |

**Supplementary Table 2: TaqMan Gene Expression probes and Taqman miRNAs probes for miR-let7 family members -a/ -b/ -c employed for qRT-PCR**

| <b>GENES</b>  | <b>Reference</b> | <b>Amplicon length</b> | <b>PCR conditions</b>                                             |
|---------------|------------------|------------------------|-------------------------------------------------------------------|
| <i>TPT1</i>   | Hs02621289_g1    | 131 bp                 | * <b>Rev. transcript.:</b> 25°C 5min, 37°C 120min, 85°C 5min.     |
| <i>HMGA2</i>  | Hs 00171569_m1   | 65 bp                  |                                                                   |
| <i>LIN28A</i> | Hs00702808_s1    | 143 bp                 | * <b>qPCR:</b> 95°C 10min, 40 cycles of 95°C 30sec and 60°C 1min. |
| <i>LIN28B</i> | Hs01013729_m1    | 130 bp                 |                                                                   |
| <i>MDR3</i>   | Hs00240956_m1    | 73 bp                  |                                                                   |
| <b>miRNAs</b> | <b>Reference</b> |                        | <b>PCR conditions</b>                                             |
| miR-let7a     | 000377           |                        | * <b>Rev. transcript.:</b> 16°C 30min, 42°C 30min, 85°C 5min.     |
| miR- let7b    | 000378           |                        |                                                                   |
| miR- let7c    | 000379           |                        | * <b>qPCR:</b> 95°C 10min, 40 cycles of 95°C 15sec and 60°C 1min. |
| RNU44         | 001094           |                        |                                                                   |
| RNU48         | 001006           |                        |                                                                   |
